# Supplementary material
Source: MDPI journal article supplement (https://www.mdpi.com/2073-4352/12/2/138)
Supplement: s1 [file s1]

*Perspective*

# A Short Review on Cryoprotectants for 3D Protein Structure Analysis

Kiyoung Jang <sup>1,†</sup>, Hyun Gi Kim <sup>1,†</sup>, Sandi Hnit San Hlaing <sup>1,2</sup>, MinSoung Kang <sup>1,3</sup>, Hui-Woog Choe <sup>4,\*</sup> and Yong Ju Kim <sup>1,5,6,\*</sup>

<sup>1</sup> Department of Lifestyle Medicine, College of Environmental and Bioresource Sciences, Jeonbuk National University, Gobong-ro 79, Iksan 54596, Korea; kiyoung64@jbnu.ac.kr (K.J.); kr6357@jbnu.ac.kr (H.G.K.); sandiaung617@gmail.com (S.H.S.H.); mukbaque@krikt.re.kr (M.K.); nationface@jbnu.ac.kr (Y.J.K.)

<sup>2</sup> Department of Botany, Dagon University, Min Ye Kyawswar street 52, East Dagon township Yangon, 11422, Myanmar

<sup>3</sup> Advanced Materials Division, Korea Research Institute of Chemical Technology (KRICT), Gajeong-ro 141, Daejeon 34114, Korea

<sup>4</sup> Department of Chemistry, College of Natural Science, Jeonbuk National University, Baekje-daero 567, Jeonju 54896, Korea

<sup>5</sup> Department of Oriental Medicine Resources, College of Environmental and Bioresource Sciences, Jeonbuk National University, Gobong-ro 79, Iksan 54596, Korea

<sup>6</sup> Advanced Institute of Environment and Bioscience, College of Environmental & Bioresources Sciences, Jeonbuk National University, Gobong-ro 79, Iksan 54596, Korea

\* Correspondence: hwchoe@jbnu.ac.kr (H.-W.Choe); nationface@jbnu.ac.kr (Y.J.K.)

† These authors contributed equally to this work.

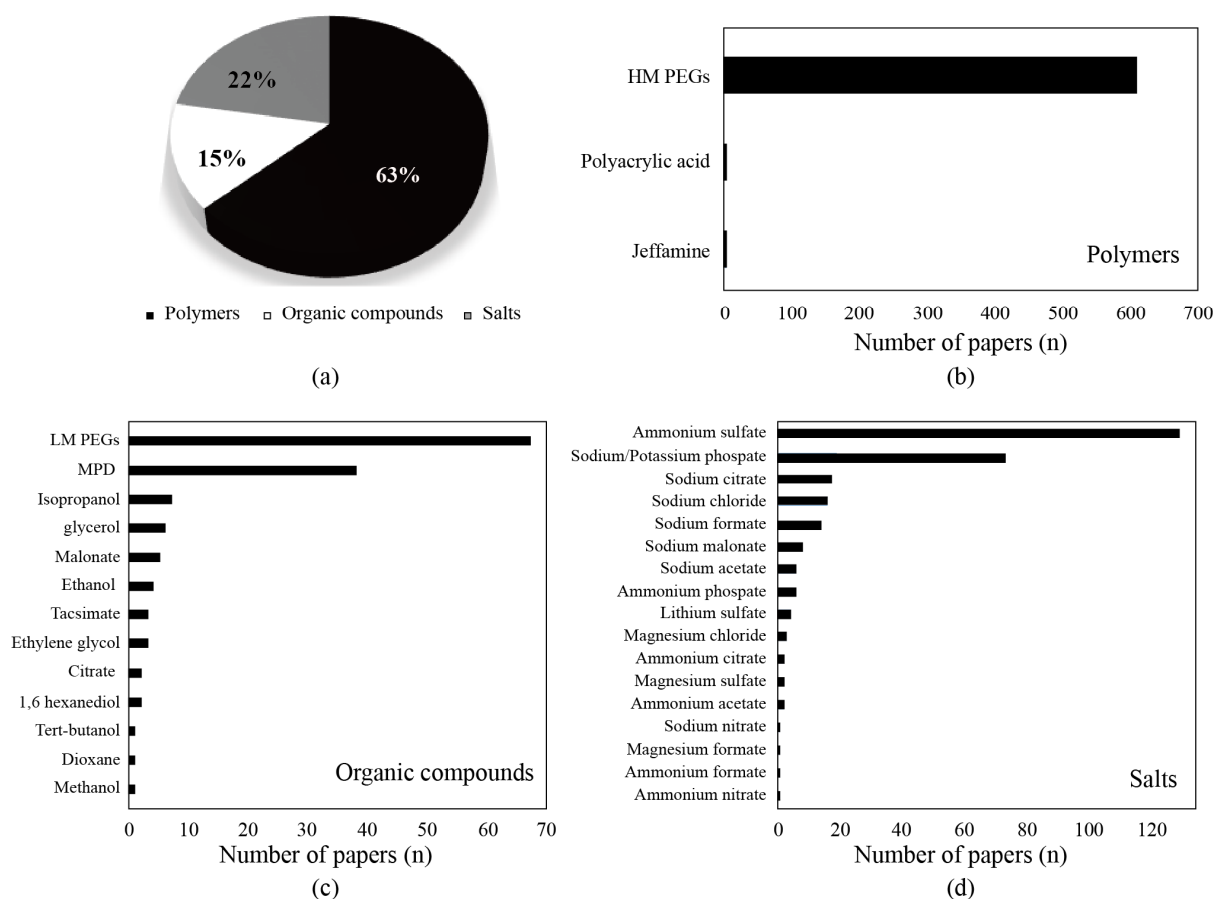

**Figure S1.** The statistic analysis of precipitants for crystallization in the structures reported to the PDB in the period of 2015 to 2021(996 publications are selected randomly). The types of precipitant: (a).Polymers are shown as black , organic compounds as white and salts as gray. (b).The most frequently applied polymers are HM(high molecular weight) PEGs. (c). The most frequently and widely used organic compounds are LM(low molecular weight) PEGs. MPD (2-Methyl-2,4-pentanediol), isopropanol glycerol, malonate, ethanol, tascimate, ethylene glycol, citrate, 1,6 hexanediol, tert-butanol, dioxane, methanol are used frequency orders of applied precipitating agents by crystallization. (d). The most frequently used salt as precipitating agents is ammonium sulfate. Sodium/potassium phosphate, sodium citrate, sodium chloride, sodium formate, sodium malonate, sodium acetate, ammonium phosphate, lithium sulfate, magnesium chloride, ammonium citrate, magnesium sulfate, ammonium acetate, sodium nitrate, magnesium formate, ammonium formate, ammonium nitrate are used frequency orders of applied precipitants for crystallization.

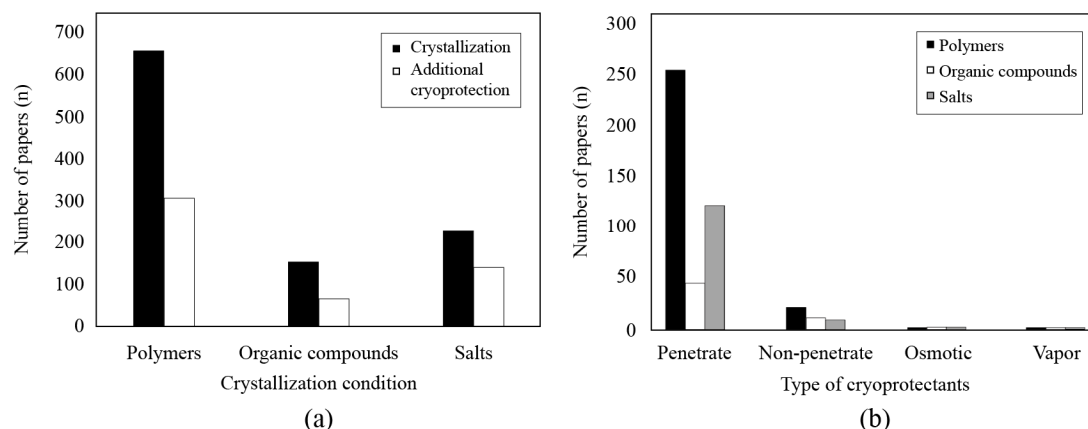

**Figure S2.** The use of additional cryoprotection. (a) The bar graph represents the publication numbers (Y-axis) versus crystallization conditions (X-axis). The publication numbers used direct crystallization conditions as cryoprotectants are shown as black bar and additional cryoprotections have been used are shown as white bar. (b) The used cryoprotectants after crystallization which are classified according to penetrate, non-penetrate, osmotic and vapor, are represented against the publication numbers. Polymers are represented as black bar, organic compound as white bar and salts as gray bar. The analyzed protein structures which have been published in the period of 2015 – 2021, are selected randomly (n = 996).

**Table S1.** Lists of commercially available cryoprotectants from two representative companies.

| Hampton research      |       |                                         | Molecular Dimensions |                                               |                                                                                 |
|-----------------------|-------|-----------------------------------------|----------------------|-----------------------------------------------|---------------------------------------------------------------------------------|
| No.                   | Conc. | Cryoprotectant                          | No.                  | Conc.                                         | Cryoprotectant                                                                  |
| <b>Same products*</b> |       |                                         |                      |                                               |                                                                                 |
| <b>Penetrate</b>      |       |                                         |                      |                                               |                                                                                 |
| 1                     | 100%  | (+/-)-2-Methyl-2,4-pentanediol (MPD)    | 1                    | 100%                                          | MPD                                                                             |
| 2                     | 100%  | 1,2-Propanediol                         | 2                    | 100%                                          | 1,2-Propanediol                                                                 |
| 3                     | 100%  | 2,3-Butanediol                          | 3                    | 100%                                          | 2,3-Butanediol                                                                  |
| 4                     | 100%  | Glycerol                                | 4                    | 100%                                          | Glycerol                                                                        |
| 5                     | 100%  | Ethylene glycol                         | 5                    | 100%                                          | Ethylene glycol                                                                 |
| 6                     | 50%   | Diethylene glycol                       | 6                    | 50%                                           | Diethylene glycol                                                               |
| 7                     | 100%  | Dimethyl sulfoxide (DMSO)               | 7                    | 100%                                          | DMSO                                                                            |
| 8                     | 100%  | Polyethylene glycol (PEG) 400           | 8                    | 100%                                          | PEG 400                                                                         |
| 9                     | 30%   | D-(+)-Maltose monohydrate               | 9                    | 30%                                           | D-(+)-Maltose monohydrate                                                       |
| <b>Non-penetrate</b>  |       |                                         |                      |                                               |                                                                                 |
| 10                    | 50%   | PEG 1,000                               | 10                   | 50%                                           | PEG 1,000                                                                       |
| 11                    | 50%   | PEG 3,350                               | 11                   | 50%                                           | PEG 3,350                                                                       |
| 12                    | 50%   | PEG monomethyl ether (MME) 5,000        | 12                   | 50%                                           | PEG MME 5,000                                                                   |
| 13                    | 50%   | PEG 8,000                               | 13                   | 50%                                           | PEG 8,000                                                                       |
| 14                    | 50%   | PEG 10,000                              | 14                   | 50%                                           | PEG 10,000                                                                      |
| <b>Other products</b> |       |                                         |                      |                                               |                                                                                 |
| <b>Penetrate</b>      |       |                                         |                      |                                               |                                                                                 |
| 15                    | 50%   | Pentaerythritol propoxylate (5/4 PO/OH) | 15                   | 30%                                           | D-Glucose                                                                       |
| 16                    | 100%  | Polypropylene glycol P 400              | 16                   | 50%                                           | Polypropylene glycol MME 500                                                    |
| 17                    | 70%   | D-(+)-Sucrose                           | 17                   | 12.5%,<br>12.5%,<br>37.5%,<br>12.5%           | Diethylene glycol,<br>MPD,<br>1,2-Propanediol,<br>DMSO                          |
| 18                    | 70%   | D-Sorbitol                              | 18                   | 25%,<br>25%,<br>25%                           | Diethylene glycol, Glycerol,<br>1,2-Propanediol                                 |
| 19                    | 35%   | meso-Erythritol                         | 19                   | 25.0%,<br>12.5%,<br>12.5%,<br>12.5%,<br>12.5% | Diethylene glycol,<br>Ethylene glycol,<br>MPD,<br>1,2-Propanediol,<br>Glycerol  |
| 20                    | 70%   | Xylitol                                 | 20                   | 12.5%,<br>25%,<br>12.5%,<br>12.5%,<br>12.5%   | Ethylene glycol,<br>MPD,<br>1,2-Propanediol,<br>DMSO,<br>Glycerol               |
| 21                    | 15%   | myo-Inositol                            | 21                   | 12.5%,<br>12.5%,<br>25%,<br>12.5%,<br>12.5%   | Diethylene glycol,<br>Ethylene glycol,<br>1,2-Propanediol,<br>DMSO,<br>Glycerol |
| 22                    | 20%   | D-(+)-Raffinose pentahydrate            | 22                   | 12.5%,<br>12.5%,<br>12.5%,<br>12.5%,<br>25%   | Diethylene glycol,<br>MPD,<br>1,2-Propanediol,<br>DMSO,<br>Glycerol             |

|    |             |                                                                      |    |                                                         |                                                                                                |
|----|-------------|----------------------------------------------------------------------|----|---------------------------------------------------------|------------------------------------------------------------------------------------------------|
| 23 | 50%         | D-(+)-Trehalose dihydrate                                            | 23 | 25%,<br>12.5%,<br>12.5%,<br>12.5%,<br>12.5%             | MPD,<br>1,2-Propanediol,<br>DMSO,<br>Glycerol,<br>Ethylene glycol                              |
| 24 | 70%         | D-(+)-Glucose monohydrate                                            | 24 | 12.5%,<br>12.5%,<br>12.5%,<br>12.5%,<br>12.5%,<br>12.5% | Diethylene glycol,<br>MPD,<br>1,2-Propanediol,<br>DMSO,<br>Glycerol,<br>Ethylene glycol        |
| 25 | 100%        | PEG MME 550                                                          | 25 | 25%,<br>12.5%,<br>12.5%,<br>12.5%,<br>12.5%,<br>12.5%   | MPD,<br>1,2-Propanediol,<br>DMSO,<br>Glycerol,<br>Ethylene glycol,<br>1,4-Dioxane              |
| 26 | 100%        | PEG 200                                                              | 26 | 12.5%,<br>25%,<br>12.5%,<br>12.5%,<br>12.5%             | Ethylene glycol,<br>MPD,<br>Glycerol,<br>2,3-Butanediol,<br>DMSO                               |
| 27 | 6.0 M       | 1,6-Hexanediol                                                       | 27 | 25%,<br>12.5%,<br>37.5%,<br>12.5%                       | Diethylene glycol,<br>MPD,<br>2,3-Butanediol,<br>1,4-Dioxane                                   |
| 28 | 6.0 M       | L-Proline                                                            | 28 | 25%,<br>12.5%,<br>25%,<br>12.5%                         | Diethylene glycol,<br>Glycerol,<br>2,3-Butanediol,<br>1,4-Dioxane                              |
| 29 | 4.0 M       | Trimethylamine N-oxide dihydrate                                     | 29 | 12.5%,<br>12.5%,<br>12.5%,<br>12.5%,<br>12.5%,<br>12.5% | Diethylene glycol,<br>Ethylene glycol,<br>Glycerol,<br>2,3-Butanediol,<br>DMSO,<br>1,4-Dioxane |
| 30 | 50%,<br>25% | Ethylene glycol,<br>3-(1-Pyridinio)-1-propanesulfonate<br>(NDSB-201) | 30 | 12.5%,<br>12.5%,<br>12.5%,<br>25%,<br>25%               | Diethylene glycol,<br>Glycerol,<br>1,2-Propanediol,<br>DMSO,<br>1,4-Dioxane                    |
| 31 | 100%        | Tacsimate™ pH 7.0                                                    | 31 | 12.5%,<br>12.5%,<br>12.5%,<br>25%,<br>37.5%             | Ethylene glycol,<br>Glycerol,<br>1,2-Propanediol,<br>DMSO,<br>1,4-Dioxane                      |
| 32 | 50%         | NDSB-201                                                             | 32 | 25%,<br>25%,<br>25%,<br>25%                             | Diethylene glycol,<br>Ethylene glycol,<br>Glycerol,<br>1,4-Dioxane                             |
|    |             |                                                                      | 33 | 12.5%,<br>25%,                                          | Diethylene glycol,<br>Ethylene glycol,                                                         |

|    |                                                                     |                                                                                                      |
|----|---------------------------------------------------------------------|------------------------------------------------------------------------------------------------------|
|    | 12.5%,<br>25%,<br>25%                                               | 1,2-Propanediol,<br>DMSO,<br>1,4-Dioxane                                                             |
| 34 | 12.5%,<br>12.5%,<br>12.5%,<br>12.5%,<br>25%,<br>25%                 | Ethylene glycol,<br>Glycerol,<br>1,2-Propanediol,<br>2,3-Butanediol,<br>DMSO,<br>1,4-Dioxane         |
| 35 | 0.3 M,<br>0.3 M                                                     | Xylitol,<br>D-Glucose                                                                                |
| 36 | 30%                                                                 | xylitol                                                                                              |
| 37 | 30%                                                                 | D-Trehalose                                                                                          |
| 38 | 30%                                                                 | Sucrose                                                                                              |
| 39 | 12.5%,<br>12.5%,<br>12.5%,<br>12.5%,<br>20%,<br>30%                 | Diethylene glycol,<br>Glycerol,<br>1,2-Propanediol,<br>2,3-Butanediol,<br>DMSO,<br>1,4-Dioxane       |
| 40 | 0.3 M,<br>0.3 M,<br>0.3 M                                           | D-Trehalose,<br>Sucrose,<br>D-Maltose                                                                |
| 41 | 100%                                                                | 1,4-Dioxane                                                                                          |
| 42 | 12.5%,<br>12.5%,<br>12.5%,<br>12.5%,<br>12.5%,<br>12.5 mM           | Diethylene glycol,<br>Ethylene glycol,<br>MPD,<br>1,2-Propanediol,<br>DMSO,<br>NDSB 201              |
| 43 | 12.5%,<br>25%,<br>12.5%,<br>12.5%,<br>12.5%,<br>12.5 mM             | Diethylene glycol,<br>Ethylene glycol,<br>MPD,<br>1,2-Propanediol,<br>Glycerol,<br>NDSB 201          |
| 44 | 12.5%,<br>12.5%,<br>12.5%,<br>12.5%,<br>12.5%,<br>12.5 mM           | Diethylene glycol,<br>MPD,<br>1,2-Propanediol,<br>DMSO,<br>Glycerol,<br>NDSB 201                     |
| 45 | 12.5%,<br>12.5%,<br>12.5%,<br>12.5%,<br>12.5%,<br>12.5 mM,<br>12.5% | Diethylene glycol,<br>MPD,<br>1,2-Propanediol,<br>DMSO,<br>Glycerol,<br>NDSB 201,<br>Ethylene glycol |
| 46 | 12.5%,<br>12.5%,<br>12.5%,                                          | Diethylene glycol,<br>MPD,<br>1,2-Propanediol,                                                       |

|    |          |                    |
|----|----------|--------------------|
|    | 25%,     | DMSO,              |
|    | 12.5%,   | Glycerol,          |
|    | 12.5 mM  | NDSB 201           |
| 47 | 12.5%,   | Diethylene glycol, |
|    | 12.5%,   | MPD,               |
|    | 12.5%,   | 1,2-Propanediol,   |
|    | 12.5%,   | DMSO,              |
|    | 12.5%,   | Glycerol,          |
|    | 12.5 mM, | NDSB 201,          |
|    | 12.5%    | 1,4-Dioxane        |
| 48 | 12.5%,   | Diethylene glycol, |
|    | 12.5%,   | MPD,               |
|    | 12.5%,   | 1,2-Propanediol,   |
|    | 12.5%,   | Glycerol,          |
|    | 12.5 mM, | NDSB 201,          |
|    | 25%,     | Ethylene glycol,   |
|    | 12.5%    | 1,4-Dioxane        |
| 49 | 12.5%,   | Diethylene glycol, |
|    | 12.5%,   | 1,2-Propanediol,   |
|    | 12.5%,   | DMSO,              |
|    | 12.5%,   | Glycerol,          |
|    | 12.5 mM, | NDSB 201,          |
|    | 12.5%    | 1,4-Dioxane        |
| 50 | 12.5%,   | Diethylene glycol, |
|    | 12.5%,   | Ethylene glycol,   |
|    | 12.5%,   | MPD,               |
|    | 12.5%,   | Glycerol,          |
|    | 12.5%,   | 2,3-Butanediol,    |
|    | 12.5%,   | DMSO,              |
|    | 12.5 mM  | NDSB 201           |
| 51 | 12.5%,   | Diethylene glycol, |
|    | 25%,     | Ethylene glycol,   |
|    | 12.5%,   | MPD,               |
|    | 12.5%,   | Glycerol,          |
|    | 12.5%,   | 2,3-Butanediol,    |
|    | 12.5 mM  | NDSB 201           |
| 52 | 12.5%,   | Diethylene glycol, |
|    | 12.5%,   | MPD,               |
|    | 12.5%,   | Glycerol,          |
|    | 12.5%,   | 2,3-Butanediol,    |
|    | 25%,     | DMSO,              |
|    | 12.5 mM  | NDSB 201           |
| 53 | 12.5%,   | Diethylene glycol, |
|    | 12.5%,   | MPD,               |
|    | 12.5%,   | Glycerol,          |
|    | 12.5%,   | 2,3-Butanediol,    |
|    | 12.5%,   | DMSO,              |
|    | 12.5%,   | 1,4-Dioxane,       |
|    | 12.5 mM  | NDSB 201           |
| 54 | 12.5%,   | Diethylene glycol, |
|    | 12.5%,   | Ethylene glycol,   |
|    | 12.5%,   | MPD,               |

|    |          |                    |
|----|----------|--------------------|
|    | 12.5%,   | Glycerol,          |
|    | 12.5%,   | 2,3-Butanediol,    |
|    | 12.5%,   | 1,4-Dioxane,       |
|    | 12.5 mM  | NDSB 201           |
| 55 | 12.5%,   | Diethylene glycol, |
|    | 12.5%,   | MPD,               |
|    | 12.5%,   | 1,2-Propanediol,   |
|    | 12.5%,   | DMSO,              |
|    | 12.5%,   | Glycerol,          |
|    | 12.5 mM, | NDSB 201,          |
|    | 12.5%    | Ethylene glycol    |
| 56 | 100 mM   | NDSB-201           |

#### Non-penetrate

|    |     |                           |
|----|-----|---------------------------|
| 33 | 50% | Polyvinylpyrrolidone K 15 |
| 34 | 80% | PEG 1600                  |
| 35 | 50% | PEG 4,000                 |

#### Others (include the mixture)

|    |        |                                |    |        |                                     |
|----|--------|--------------------------------|----|--------|-------------------------------------|
| 36 | 5.0 M  | Lithium acetate dihydrate      | 57 | 2.5 M  | Lithium sulfate                     |
| 37 | 10.0 M | Lithium chloride               | 58 | 2.5 M  | Lithium formate monohydrate         |
| 38 | 4.0 M  | Lithium formate monohydrate    | 59 | 2.5 M  | Sodium malonate dibasic monohydrate |
| 39 | 8.0 M  | Lithium nitrate                | 60 | 1.0 M  | Sodium sulfate                      |
| 40 | 2.0 M  | Lithium sulfate monohydrate    | 61 | 2.5 M  | Sodium formate                      |
| 41 | 3.4 M  | Sodium malonate pH 7.0         | 62 | 0.3 M, | Sodium malonate dibasic             |
|    |        |                                |    | 0.3 M, | monohydrate, Sodium sulfate,        |
|    |        |                                |    | 0.3 M  | Sodium formate                      |
| 42 | 3.4 M  | Magnesium acetate tetrahydrate |    |        |                                     |
| 43 | 5.0 M  | Sodium chloride                |    |        |                                     |
| 44 | 7.0 M  | Sodium formate                 |    |        |                                     |
| 45 | 7.0 M  | Sodium nitrate                 |    |        |                                     |
| 46 | 1.0 M  | Sodium sulfate decahydrate     |    |        |                                     |
| 47 | 30%,   | PEG 3,350,                     |    |        |                                     |
|    | 20%,   | Glycerol                       |    |        |                                     |
| 48 | 30%,   | PEG 400,                       |    |        |                                     |
|    | 10%,   | PEG 20,000,                    |    |        |                                     |
|    | 5%,    | Glycerol,                      |    |        |                                     |
|    | 5%     | NDSB-201                       |    |        |                                     |

\* Blue colored written products names from No. 1 to 14 are the same selling items by two different companies.
